# Supplementary material
Source: PubMed Central journal article supplement (PMC4527534)

## Supplementary Figure S2

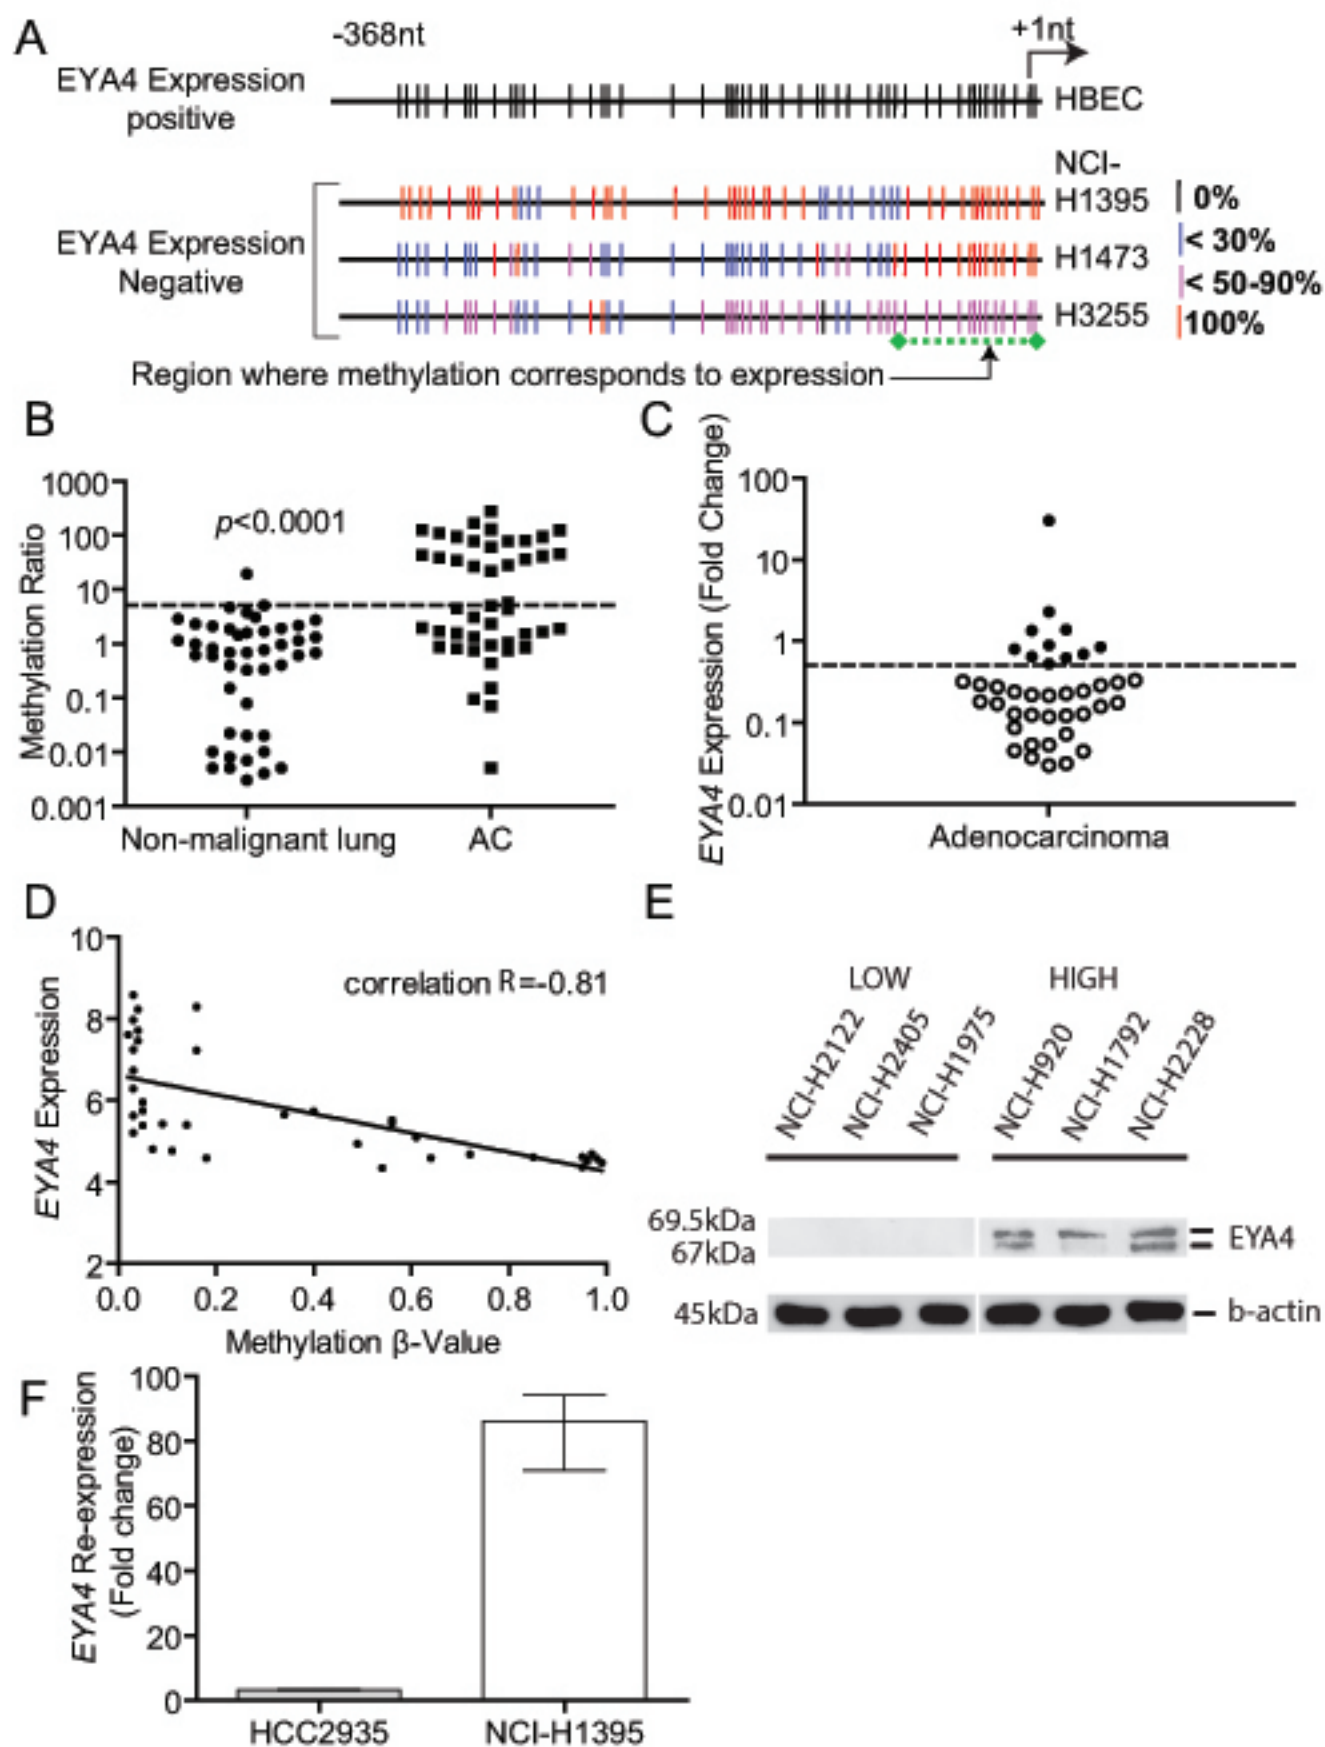

Supplement: NIHMS560215-supplement-3.pdf [file NIHMS560215-supplement-3.pdf]

Supplemental Figure S3

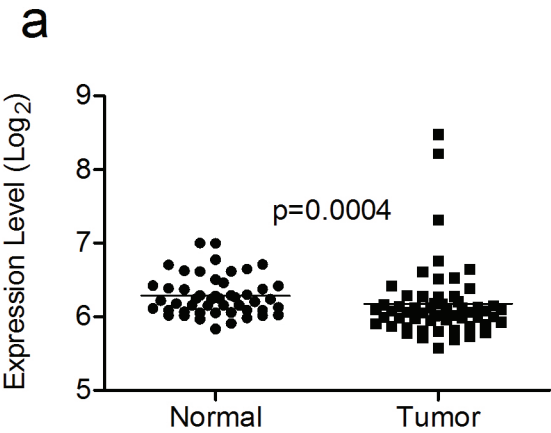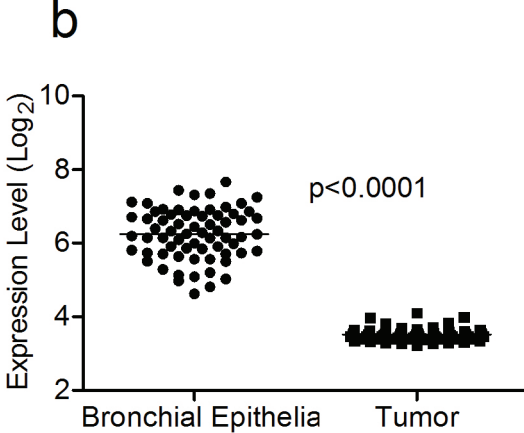

Supplement: NIHMS560215-supplement-5.pdf [file NIHMS560215-supplement-5.pdf]

# Supplemental Figure S4

A

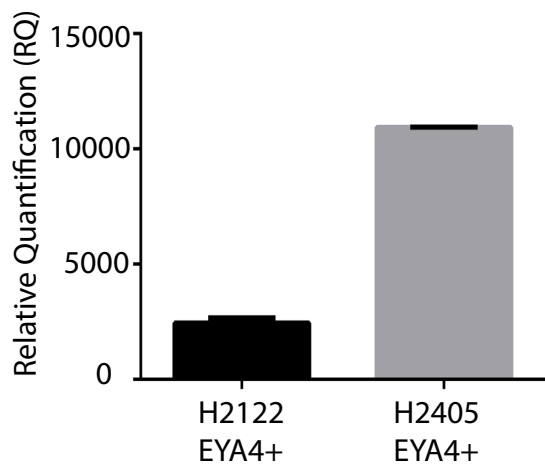

B

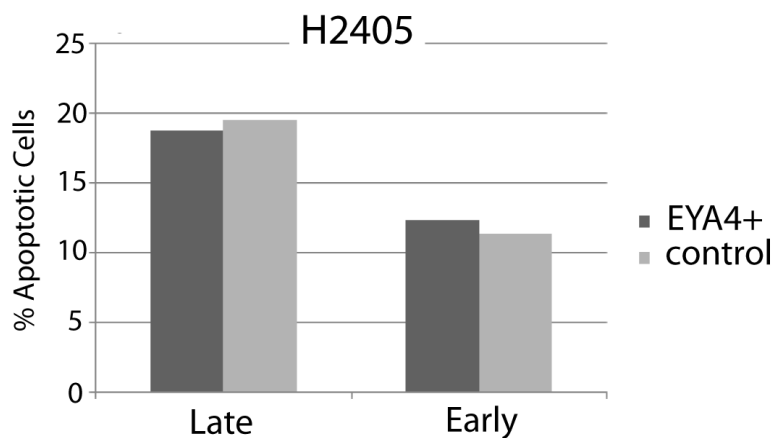

C

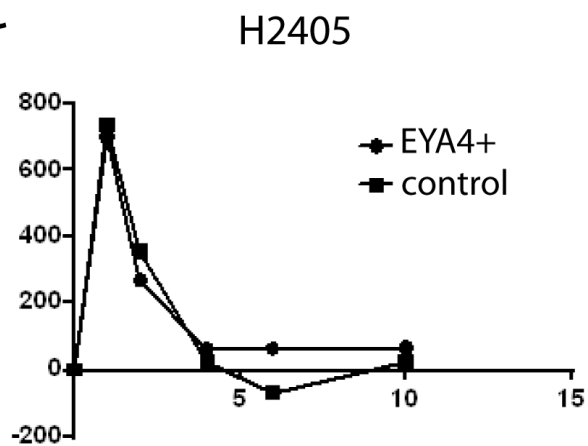

D

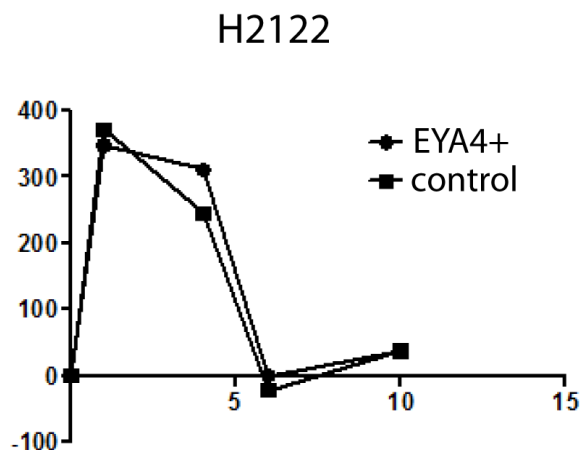

Supplement: NIHMS560215-supplement-7.pdf [file NIHMS560215-supplement-7.pdf]
